# Supplementary material for: Comparing Attitudes toward Sexual Consent between Japan and Canada
Source: MDPI journal article supplement (doi:10.3390/sexes5020004), 2024-03-27
Supplement: s1 [file s1]

**Table S1.** Descriptive statistics and results of *t*-tests for perceived appropriateness of punishment items

|      |                                                                                                                                                                                                                                                                           | Japan    |           | Canada   |           | <i>p</i> | <i>d</i> | 95%CI |                   |
|------|---------------------------------------------------------------------------------------------------------------------------------------------------------------------------------------------------------------------------------------------------------------------------|----------|-----------|----------|-----------|----------|----------|-------|-------------------|
|      |                                                                                                                                                                                                                                                                           | <i>M</i> | <i>SD</i> | <i>M</i> | <i>SD</i> |          |          |       |                   |
| pun1 | A proposed intercourse, B accepted on condition that A used a condom. A said, "OK" and then penetrated B without a condom. B told A to withdraw. A refused until he ejaculated.                                                                                           |          |           |          |           |          |          |       |                   |
|      | AさんはBさんに性交をするよう求め、Bさんはコンドームを使うという条件で同意しました。Aさんは「それでいいよ」と言いましたが、コンドームをつけずに性器を挿入しました。BさんはAさんにやめてと言いましたが、Aさんは射精するまでやめませんでした。                                                                                                                                                 | 3.89     | 0.96      | 4.16     | 0.96      | < 0.01   | **       | -0.28 | [ -0.36 , -0.20 ] |
|      | (B) a accepté un rapport sexuel à condition que (A ) utilise un préservatif. (A) a dit « OK », mais il a pénétré (B) sans préservatif. (B) a dit à (A) de se retirer mais (A) ne s'est pas arrêté avant d'avoir éjaculé.                                                  |          |           |          |           |          |          |       |                   |
| pun2 | A overpowered B physically, held her down despite B's attempts to resist and threatened her with additional force if she continued to resist.                                                                                                                             |          |           |          |           |          |          |       |                   |
|      | AさんはBさんを力づくで押さえつけ、Bさんの反抗を制止しました。そして、Aさんは、Bさんが反抗を続けるのならもつと強い力を加えると脅しました。                                                                                                                                                                                                   | 4.23     | 0.94      | 4.39     | 0.94      | < 0.01   | **       | -0.17 | [ -0.25 , -0.08 ] |
|      | (A) a maîtrisé (B) physiquement, l'a maintenu au sol malgré ses tentatives de résister . (A) a menacé d'appliquer une force plus forte si (B) continuait à résister.                                                                                                      |          |           |          |           |          |          |       |                   |
| pun3 | A and B had dated, but B had rebuffed A's advances. On this occasion, B was severely intoxicated, although she had not passed out. In response to A's advances, B said nothing when A removed her clothes, but was clearly too weak to resist.                            |          |           |          |           |          |          |       |                   |
|      | AさんとBさんは付き合っていますが、Bさんは言い寄ってくるAさんを断っていました。このような状況で、Bさんは意識を失ってはいなかったもののひどく酔っていました。Aさんが言い寄ってくるのに対して、BさんはAさんに服を脱がされても何も言いませんでしたが、抵抗できないほど明らかに弱っていました。                                                                                                                         | 3.77     | 0.95      | 4.06     | 0.95      | < 0.01   | **       | -0.31 | [ -0.39 , -0.22 ] |
|      | (A) et (B) se fréquentaient, mais (B) avait repoussé les avances de (A). À cette occasion (B) était gravement intoxiqué mais n'avait pas perdu connaissance. (B) n'a rien dit quand (A) lui a enlevé ses vêtements, mais elle était clairement trop faible pour résister. |          |           |          |           |          |          |       |                   |
| pun4 | A, a supervisor at a large corporation, told B that he would engineer an undeserved promotion for which B had applied if she had sexual relations with him                                                                                                                |          |           |          |           |          |          |       |                   |
|      | 大企業の役員であるAさんは、Bさんにこう言いました。それは、もしBさんがAさんと性的な関係を持つのであれば、Bさんが申請した本来なら通るはずのない昇進申請を通してあげよう、というものでした。                                                                                                                                                                           | 3.85     | 0.99      | 4.15     | 0.97      | < 0.01   | **       | -0.30 | [ -0.39 , -0.22 ] |
|      | (A) un responsable d'une grande entreprise a dit à (B) qu'il donnerait une promotion imméritée pour laquelle (B) avait postulé, en échange de relations sexuelles                                                                                                         |          |           |          |           |          |          |       |                   |
| pun5 | A and B commenced what they thought would be a normal sexual interaction. B unexpectedly found intercourse painful on this occasion, and asked A to stop. A did not withdraw until he ejaculated.                                                                         |          |           |          |           |          |          |       |                   |
|      | AさんとBさんは、二人がいつもやっていたような性交を始めましたが、Bさんは特にこの時に限っては苦痛に感じたので、やめてくれるようAさんに頼みました。しかしAさんは射精するまでやめませんでした。                                                                                                                                                                          | 3.36     | 0.93      | 3.78     | 1.02      | < 0.01   | **       | -0.42 | [ -0.51 , -0.34 ] |
|      | (A) et (B) ont commencé à avoir des rapports sexuels comme d'habitude, mais de manière inattendue (B) a ressenti de la douleur à ce moment-là, alors (B) a demandé à (A) d'arrêter. Mais (A) ne s'est pas retiré jusqu'à ce qu'il ait éjaculé.                            |          |           |          |           |          |          |       |                   |

**Table S1.** Descriptive statistics and results of *t*-tests for perceived appropriateness of punishment items (continued)

|      |                                                                                                                                                                                                                           | Japan    |           | Canada   |           | <i>p</i> | <i>d</i> | 95%CI            |                   |
|------|---------------------------------------------------------------------------------------------------------------------------------------------------------------------------------------------------------------------------|----------|-----------|----------|-----------|----------|----------|------------------|-------------------|
|      |                                                                                                                                                                                                                           | <i>M</i> | <i>SD</i> | <i>M</i> | <i>SD</i> |          |          |                  |                   |
| pun6 | A was infatuated with B, but B had rebuffed him. A told B that he would commit suicide unless B had sexual relations with him.                                                                                            |          |           |          |           |          |          |                  |                   |
|      | AさんはBさんに恋心を抱いていますが、Bさんは性的関係を結ぼうとするAさんを拒絶しました。AさんはBさんに、Bさんが自分と性的関係を持たなければ自殺すると言いました。                                                                                                                                       | 3.38     | 1.02      | 3.36     | 1.16      | 0.57     | 0.02     | [ -0.06 , 0.11 ] |                   |
|      | (A) était amoureux de (B), mais (B) l'avait repoussé. (A) a menacé de se suicider à moins qu'ils aient des relations sexuelles ensemble.                                                                                  |          |           |          |           |          |          |                  |                   |
| pun7 | A, whose identical twin was married to B, slipped into B's bed while she was half asleep. B believed that A was her husband.                                                                                              |          |           |          |           |          |          |                  |                   |
|      | Aさんの双子の兄弟はBさんと結婚しています。AさんはBさんが半分眠っている時にBさんのベッドに忍び込みました。BさんはAさんを夫だと思い込んでいました。                                                                                                                                              | 3.60     | 0.99      | 3.88     | 1.11      | < 0.01   | **       | -0.27            | [ -0.35 , -0.18 ] |
|      | (A) est le jumeau identique de son frère qui est marié à (B). (A) s'est glissé dans le lit de (B) qui était à moitié endormi. (B) croyait que (A) était son conjoint.                                                     |          |           |          |           |          |          |                  |                   |
| pun8 | A made advances which B rejected. A repeated his advances five times. On the sixth occasion, B said, ""You don't take no for an answer, do you? If it'll make you happy, go ahead.                                        |          |           |          |           |          |          |                  |                   |
|      | AさんはBさんに言い寄りました。Aさんは5回言い寄り続けました。6回目に言い寄ったとき、Bさんは「あなたは何度断っても納得してくれないのね。それであなたが幸せになるなら、さあどうぞ」と言いました。                                                                                                                        | 2.64     | 1.02      | 2.9      | 1.21      | < 0.01   | **       | -0.23            | [ -0.31 , -0.15 ] |
|      | (A) a fait des avances que (B) a rejetées. (A) a répété ses avances à cinq reprises. À la sixième fois (B) a dit : «Tu ne prends pas le «non» pour une réponse, n'est-ce pas ? Si ça peut te faire plaisir, alors vas-y». |          |           |          |           |          |          |                  |                   |
| pun9 | A and B were married. A proposed that they had intercourse. B was not "in the mood," but she knew that it was "been while" and wanted to show her love for B and so agreed.                                               |          |           |          |           |          |          |                  |                   |
|      | AさんとBさんは結婚していました。Aさんは性交をしようと提案しました。Bさんは「気分が乗らなかった」のですが、しばらく「ごぶさた」だったのでAさんへの愛を示したいと思い、同意しました。                                                                                                                              | 2.22     | 1.08      | 2.16     | 1.16      | 0.17     | 0.06     | [ -0.02 , 0.14 ] |                   |
|      | (A) et (B) étaient mariés. (A) a proposé qu'ils aient des rapports sexuels. (B) n'était pas «d'humeur», mais elle savait que cela «fait longtemps» et voulait montrer son amour à (B), (A) a donc accepté.                |          |           |          |           |          |          |                  |                   |

**Table S2.** Descriptive statistics and results of *t*-tests for perceived victim’s consent items

|      |                                                                                                                                                                                                                                                                           | Japan    |           | Canada   |           | <i>p</i> | <i>d</i> | 95%CI            |  |
|------|---------------------------------------------------------------------------------------------------------------------------------------------------------------------------------------------------------------------------------------------------------------------------|----------|-----------|----------|-----------|----------|----------|------------------|--|
|      |                                                                                                                                                                                                                                                                           | <i>M</i> | <i>SD</i> | <i>M</i> | <i>SD</i> |          |          |                  |  |
| con1 | A proposed intercourse, B accepted on condition that A used a condom. A said, "OK" and then penetrated B without a condom. B told A to withdraw. A refused until he ejaculated.                                                                                           |          |           |          |           |          |          |                  |  |
|      | AさんはBさんに性交をするよう求め、Bさんはコンドームを使うという条件で同意しました。Aさんは「それでいいよ」と言いましたが、コンドームをつけずに性器を挿入しました。BさんはAさんにやめてと言いましたが、Aさんは射精するまでやめませんでした。                                                                                                                                                 | 2.37     | 1.08      | 2.31     | 1.23      | 0.19     | 0.06     | [ -0.03 , 0.14 ] |  |
|      | (B) a accepté un rapport sexuel à condition que (A) utilise un préservatif. (A) a dit « OK », mais il a pénétré (B) sans préservatif. (B) a dit à (A) de se retirer mais (A) ne s'est pas arrêté avant d'avoir éjaculé.                                                   |          |           |          |           |          |          |                  |  |
| con2 | A overpowered B physically, held her down despite B's attempts to resist and threatened her with additional force if she continued to resist.                                                                                                                             |          |           |          |           |          |          |                  |  |
|      | AさんはBさんを力づくで押さえつけ、Bさんの反抗を制止しました。そして、Aさんは、Bさんが反抗を続けるのならもっと強い力を加えると脅しました。                                                                                                                                                                                                   | 1.82     | 0.98      | 1.65     | 1.14      | <0.01 ** | 0.16     | [ 0.07 , 0.24 ]  |  |
|      | (A) a maîtrisé (B) physiquement, l'a maintenu au sol malgré ses tentatives de résister . (A) a menacé d'appliquer une force plus forte si (B) continuait à résister.                                                                                                      |          |           |          |           |          |          |                  |  |
| con3 | A and B had dated, but B had rebuffed A's advances. On this occasion, B was severely intoxicated, although she had not passed out. In response to A's advances, B said nothing when A removed her clothes, but was clearly too weak to resist.                            |          |           |          |           |          |          |                  |  |
|      | AさんとBさんは付き合っていますが、Bさんは言い寄ってくるAさんを断っていました。このような状況で、Bさんは意識を失ってはいなかったもののひどく酔っていました。Aさんが言い寄ってくるのに対して、BさんはAさんに服を脱がされても何も言いませんでしたが、抵抗できないほど明らかに弱っていました。                                                                                                                         | 2.06     | 0.96      | 1.98     | 1.13      | 0.07 +   | 0.08     | [ -0.01 , 0.16 ] |  |
|      | (A) et (B) se fréquentaient, mais (B) avait repoussé les avances de (A). À cette occasion (B) était gravement intoxiqué mais n'avait pas perdu connaissance. (B) n'a rien dit quand (A) lui a enlevé ses vêtements, mais elle était clairement trop faible pour résister. |          |           |          |           |          |          |                  |  |
| con4 | A, a supervisor at a large corporation, told B that he would engineer an undeserved promotion for which B had applied if she had sexual relations with him                                                                                                                |          |           |          |           |          |          |                  |  |
|      | 大企業の役員であるAさんは、Bさんにこう言いました。それは、もしBさんがAさんと性的な関係を持つのであれば、Bさんが申請した本来なら通るはずのない昇進申請を通してあげよう、というものでした。                                                                                                                                                                           | 2.38     | 1.07      | 2.36     | 1.23      | 0.74     | 0.01     | [ -0.07 , 0.10 ] |  |
|      | (A) un responsable d'une grande entreprise a dit à (B) qu'il donnerait une promotion imméritée pour laquelle (B) avait postulé, en échange de relations sexuelles                                                                                                         |          |           |          |           |          |          |                  |  |
| con5 | A and B commenced what they thought would be a normal sexual interaction. B unexpectedly found intercourse painful on this occasion, and asked A to stop. A did not withdraw until he ejaculated.                                                                         |          |           |          |           |          |          |                  |  |
|      | AさんとBさんは、二人がいつもやっていたような性交を始めましたが、Bさんは特にこの時に限っては苦痛に感じたので、やめてくれるようAさんに頼みました。しかしAさんは射精するまでやめませんでした。                                                                                                                                                                          | 2.47     | 1.04      | 2.53     | 1.22      | 0.21     | -0.05    | [ -0.13 , 0.03 ] |  |
|      | (A) et (B) ont commencé à avoir des rapports sexuels comme d'habitude, mais de manière inattendue (B) a ressenti de la douleur à ce moment-là, alors (B) a demandé à (A) d'arrêter. Mais (A) ne s'est pas retiré jusqu'à ce qu'il ait éjaculé.                            |          |           |          |           |          |          |                  |  |

Table S2. Descriptive statistics and results of *t*-tests for perceived victim’s consent items (continued)

|      |                                                                                                                                                                                                                           | Japan    |           | Canada   |           | <i>p</i> | <i>d</i> | 95%CI |                   |
|------|---------------------------------------------------------------------------------------------------------------------------------------------------------------------------------------------------------------------------|----------|-----------|----------|-----------|----------|----------|-------|-------------------|
|      |                                                                                                                                                                                                                           | <i>M</i> | <i>SD</i> | <i>M</i> | <i>SD</i> |          |          |       |                   |
| con6 | A was infatuated with B, but B had rebuffed him. A told B that he would commit suicide unless B had sexual relations with him.                                                                                            |          |           |          |           |          |          |       |                   |
|      | AさんはBさんに恋心を抱いていますが、Bさんは性的関係を結ぼうとするAさんを拒絶しました。AさんはBさんに、Bさんが自分と性的関係を持たなければ自殺すると言いました。                                                                                                                                       | 2.12     | 1.00      | 2.30     | 1.15      | < 0.01   | **       | -0.17 | [ -0.25 , -0.09 ] |
|      | (A) était amoureux de (B), mais (B) l'avait repoussé. (A) a menacé de se suicider à moins qu'ils aient des relations sexuelles ensemble.                                                                                  |          |           |          |           |          |          |       |                   |
| con7 | A, whose identical twin was married to B, slipped into B's bed while she was half asleep. B believed that A was her husband.                                                                                              |          |           |          |           |          |          |       |                   |
|      | Aさんの双子の兄弟はBさんと結婚しています。AさんはBさんが半分眠っている時にBさんのベッドに忍び込みました。BさんはAさんを夫だと思い込んでいました。                                                                                                                                              | 2.23     | 1.01      | 2.09     | 1.20      | < 0.01   | **       | 0.12  | [ 0.04 , 0.20 ]   |
|      | (A) est le jumeau identique de son frère qui est marié à (B). (A) s'est glissé dans le lit de (B) qui était à moitié endormi. (B) croyait que (A) était son conjoint.                                                     |          |           |          |           |          |          |       |                   |
| con8 | A made advances which B rejected. A repeated his advances five times. On the sixth occasion, B said, ""You don't take no for an answer, do you? If it'll make you happy, go ahead.                                        |          |           |          |           |          |          |       |                   |
|      | AさんはBさんに言い寄りました。Aさんは5回言い寄り続けました。6回目に言い寄ったとき、Bさんは「あなたは何度断っても納得してくれないのね。それであなたが幸せになるなら、さあどうぞ」と言いました。                                                                                                                        | 3.17     | 1.04      | 3.14     | 1.23      | 0.64     |          | 0.02  | [ -0.06 , 0.10 ]  |
|      | (A) a fait des avances que (B) a rejetées. (A) a répété ses avances à cinq reprises. À la sixième fois (B) a dit : «Tu ne prends pas le «non» pour une réponse, n'est-ce pas ? Si ça peut te faire plaisir, alors vas-y». |          |           |          |           |          |          |       |                   |
| con9 | A and B were married. A proposed that they had intercourse. B was not "in the mood," but she knew that it was "been while" and wanted to show her love for B and so agreed.                                               |          |           |          |           |          |          |       |                   |
|      | AさんとBさんは結婚していました。Aさんは性交をしようと提案しました。Bさんは「気分が乗らなかった」のですが、しばらく「ごぶさた」だったのでAさんへの愛を示したいと思い、同意しました。                                                                                                                              | 3.47     | 1.05      | 3.60     | 1.19      | < 0.01   | **       | -0.12 | [ -0.20 , -0.03 ] |
|      | (A) et (B) étaient mariés. (A) a proposé qu'ils aient des rapports sexuels. (B) n'était pas «d'humeur», mais elle savait que cela «fait longtemps» et voulait montrer son amour à (B), (A) a donc accepté.                |          |           |          |           |          |          |       |                   |

**Table S3.** Detailed results of mediation analysis

| Dependent variable                             | <i>B</i> | <i>S.E.</i> | <i>z</i> | <i>p</i> | 95%CI               |
|------------------------------------------------|----------|-------------|----------|----------|---------------------|
| <i>Perceived appropriateness of punishment</i> |          |             |          |          |                     |
| Perceived consent                              | -0.411   | 0.031       | -13.197  | < 0.001  | [ -0.475 , -0.354 ] |
| Nation (Japan = 0, Canada = 1)                 | 0.222    | 0.029       | 7.756    | < 0.001  | [ 0.164 , 0.276 ]   |
| Gender (Woman = 0, Man = 1)                    | -0.096   | 0.029       | -3.358   | 0.001    | [ -0.154 , -0.040 ] |
| Age                                            | 0.000    | 0.001       | -0.196   | 0.845    | [ -0.002 , 0.002 ]  |
| <i>Perceived victim's consent</i>              |          |             |          |          |                     |
| Nation (Japan = 0, Canada = 1)                 | -0.079   | 0.039       | -2.026   | 0.043    | [ -0.156 , -0.003 ] |
| Gender (Woman = 0, Man = 1)                    | 0.267    | 0.040       | 6.743    | < 0.001  | [ 0.191 , 0.346 ]   |
| Age                                            | -0.002   | 0.001       | -1.752   | 0.080    | [ -0.005 , 0.000 ]  |
| <i>Indirect effects</i>                        |          |             |          |          |                     |
|                                                | -0.091   | 0.012       |          |          | [ -0.116 , -0.067 ] |
